# Supplementary material
Source: MDPI journal article supplement (https://www.mdpi.com/1999-4907/13/12/2128)
Supplement: s1 [file s1]

Figure S2. Localization of long-term territories of Ural owls.

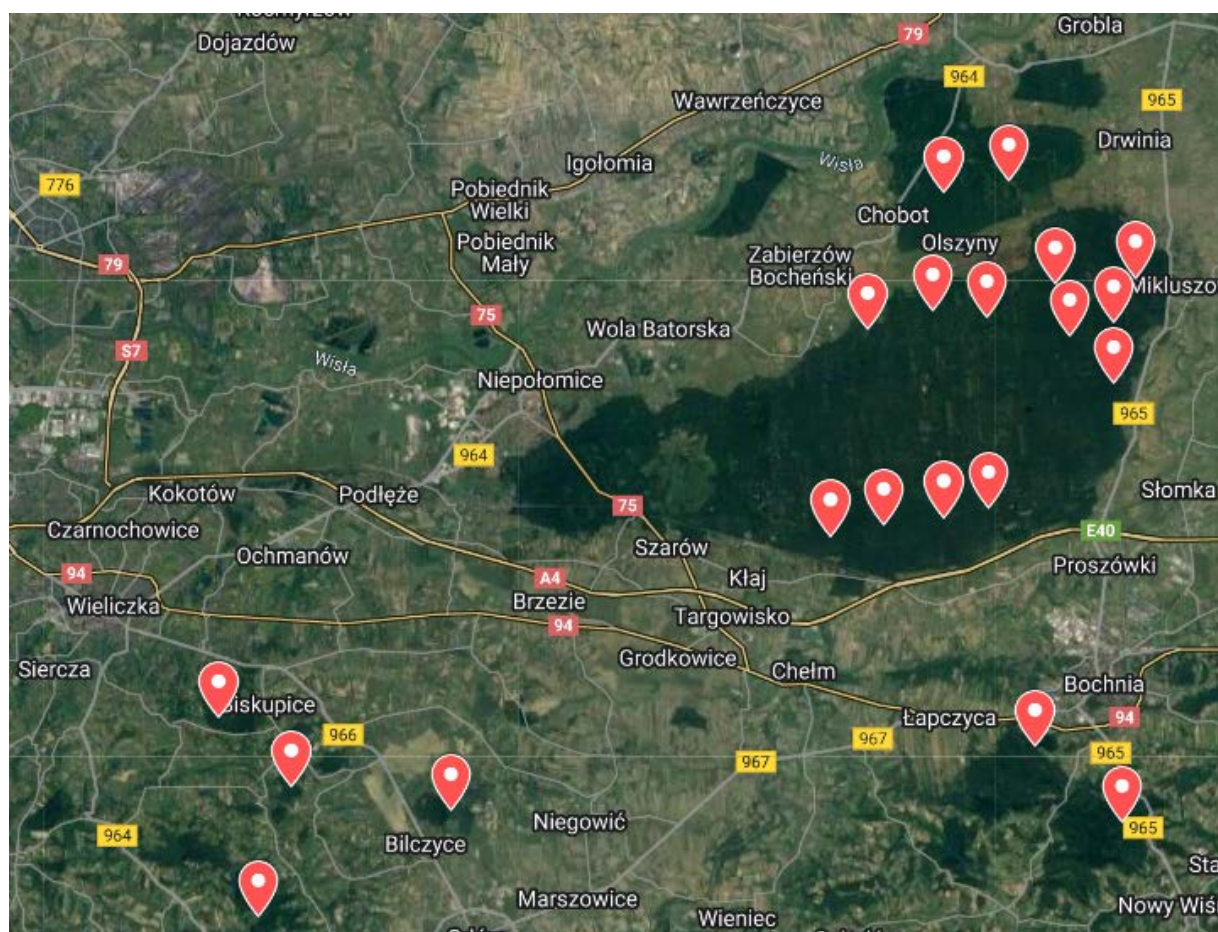

<https://www.google.com/maps/d/u/0/edit?mid=1dDKLrzDjHJqBKml0Q-cpnctLxciwX0E&usp=sharing>



Figure S3. Localization of control sites (unoccupied by goshawks and Ural owls).

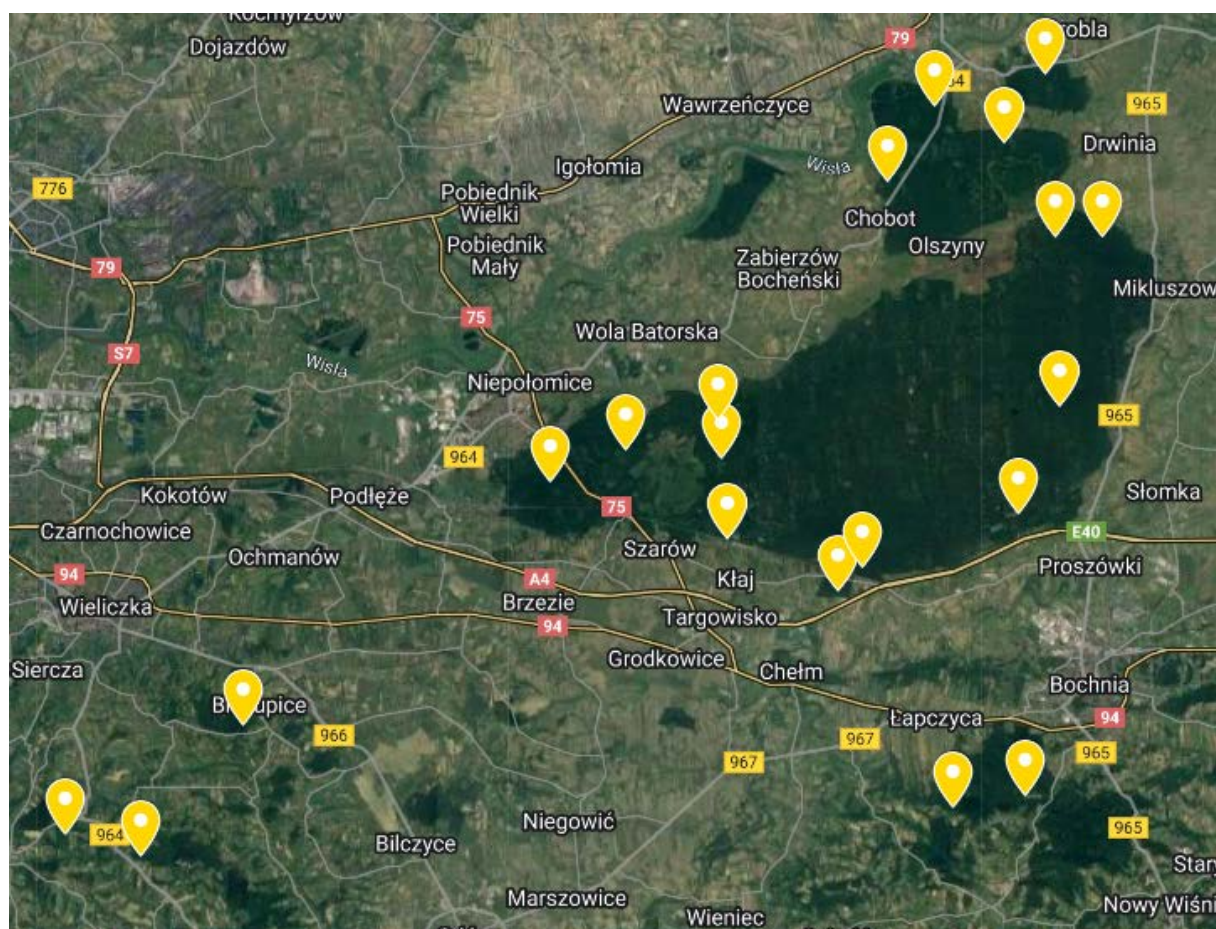

<https://www.google.com/maps/d/u/0/edit?mid=1n9GFdZeh88wW2PHBCC8i1sBqbp7f0VI&usp=sharing>

Table S1. Localization of examined plots with their assignment to the raptor occurrence (AG - goshawk, SU - Ural owl), and forest type (deciduous vs coniferous).

| ID        | AG | SU | deciduous | coniferous | E          | N          |
|-----------|----|----|-----------|------------|------------|------------|
| AG01      | 1  | 1  | 1         | 0          | 49.935563° | 20.436737° |
| AG02      | 1  | 0  | 1         | 0          | 49.946019° | 20.386881° |
| AG03      | 1  | 1  | 1         | 0          | 49.960601° | 20.102884° |
| AG04      | 1  | 1  | 1         | 0          | 49.938496° | 20.188545° |
| AG05      | 1  | 1  | 1         | 0          | 49.913129° | 20.117545° |
| AG06      | 1  | 0  | 1         | 0          | 50.105831° | 20.355875° |
| AG07      | 1  | 1  | 1         | 0          | 50.085433° | 20.370739° |
| AG08      | 1  | 0  | 1         | 0          | 50.109331° | 20.422803° |
| AG09      | 1  | 1  | 1         | 0          | 50.057139° | 20.366286° |
| AG10      | 1  | 0  | 1         | 0          | 50.010188° | 20.422559° |
| AG11      | 1  | 0  | 0         | 1          | 49.997116° | 20.359879° |
| AG12      | 1  | 0  | 0         | 1          | 49.999108° | 20.379190° |
| AG13      | 1  | 1  | 0         | 1          | 50.003909° | 20.328729° |
| AG14      | 1  | 0  | 0         | 1          | 50.012164° | 20.294353° |
| AG15      | 1  | 0  | 0         | 1          | 50.038341° | 20.322379° |
| AG16      | 1  | 0  | 0         | 1          | 50.006977° | 20.240650° |
| AG17      | 1  | 0  | 0         | 1          | 50.025881° | 20.239020° |
| AG18      | 1  | 1  | 0         | 1          | 50.054430° | 20.433175° |
| AG19      | 1  | 0  | 0         | 1          | 50.027040° | 20.429689° |
| AG20      | 1  | 1  | 0         | 1          | 50.063933° | 20.412228° |
| SU01      | 1  | 1  | 1         | 0          | 49.935563° | 20.436737° |
| SU02      | 0  | 1  | 1         | 0          | 49.953866° | 20.404497° |
| SU03      | 1  | 1  | 1         | 0          | 49.960601° | 20.102884° |
| SU04      | 0  | 1  | 1         | 0          | 49.943961° | 20.129384° |
| SU05      | 1  | 1  | 1         | 0          | 49.938496° | 20.188545° |
| SU06      | 1  | 1  | 1         | 0          | 49.913129° | 20.117545° |
| SU07      | 1  | 1  | 1         | 0          | 50.085433° | 20.370739° |
| SU08      | 0  | 1  | 1         | 0          | 50.088012° | 20.394451° |
| SU09      | 0  | 1  | 1         | 0          | 50.052604° | 20.342697° |
| SU10      | 1  | 1  | 1         | 0          | 50.057139° | 20.366286° |
| SU11      | 0  | 1  | 0         | 1          | 50.010336° | 20.387019° |
| SU12      | 0  | 1  | 0         | 1          | 50.055855° | 20.386242° |
| SU13      | 0  | 1  | 0         | 1          | 50.008323° | 20.370572° |
| SU14      | 0  | 1  | 0         | 1          | 50.006350° | 20.348568° |
| SU15      | 1  | 1  | 0         | 1          | 50.003909° | 20.328729° |
| SU16      | 0  | 1  | 0         | 1          | 50.065236° | 20.441182° |
| SU17      | 1  | 1  | 0         | 1          | 50.054430° | 20.433175° |
| SU18      | 0  | 1  | 0         | 1          | 50.039724° | 20.433205° |
| SU19      | 0  | 1  | 0         | 1          | 50.051473° | 20.417139° |
| SU20      | 1  | 1  | 0         | 1          | 50.063933° | 20.412228° |
| control01 | 0  | 0  | 1         | 0          | 49.942145° | 20.405477° |
| control02 | 0  | 0  | 1         | 0          | 49.939426° | 20.378882° |
| control03 | 0  | 0  | 1         | 0          | 49.958618° | 20.115324° |
| control04 | 0  | 0  | 1         | 0          | 49.927276° | 20.076644° |
| control05 | 0  | 0  | 1         | 0          | 49.932572° | 20.048563° |

|           |   |   |   |   |            |            |
|-----------|---|---|---|---|------------|------------|
| control06 | 0 | 0 | 1 | 0 | 50.106711° | 20.371818° |
| control07 | 0 | 0 | 1 | 0 | 50.088983° | 20.355260° |
| control08 | 0 | 0 | 1 | 0 | 50.098294° | 20.398520° |
| control09 | 0 | 0 | 1 | 0 | 50.114543° | 20.413535° |
| control10 | 0 | 0 | 1 | 0 | 49.991028° | 20.336064° |
| control11 | 0 | 0 | 0 | 1 | 50.009404° | 20.403816° |
| control12 | 0 | 0 | 0 | 1 | 50.022638° | 20.293028° |
| control13 | 0 | 0 | 0 | 1 | 50.003407° | 20.295283° |
| control14 | 0 | 0 | 0 | 1 | 50.031878° | 20.291671° |
| control15 | 0 | 0 | 0 | 1 | 49.996794° | 20.345157° |
| control16 | 0 | 0 | 0 | 1 | 50.016979° | 20.229204° |
| control17 | 0 | 0 | 0 | 1 | 50.024625° | 20.257488° |
| control18 | 0 | 0 | 0 | 1 | 50.075773° | 20.417469° |
| control19 | 0 | 0 | 0 | 1 | 50.075432° | 20.434284° |
| control20 | 0 | 0 | 0 | 1 | 50.035110° | 20.418587° |

---

**Table S2. Diversity of birds detected during wintering and breeding counts on selected plots.**

[illegible]

Table S3. Basic statistics describing bird diversity metrics and

| Variable                | Group    | Mean | Median | Min  | Max   | SD   | SE  |
|-------------------------|----------|------|--------|------|-------|------|-----|
| wintering & deciduous   |          |      |        |      |       |      |     |
| Richness                | goshawk  | 18.6 | 18.5   | 15.0 | 24.0  | 2.6  | 0.8 |
|                         | Ural owl | 18.6 | 18.5   | 13.0 | 24.0  | 3.2  | 1.0 |
|                         | control  | 13.5 | 14.0   | 10.0 | 17.0  | 2.2  | 0.7 |
| Abundance               | goshawk  | 63.3 | 58.5   | 30.0 | 95.0  | 21.1 | 6.7 |
|                         | Ural owl | 61.0 | 58.5   | 37.0 | 85.0  | 18.6 | 5.9 |
|                         | control  | 35.9 | 34.5   | 20.0 | 51.0  | 10.5 | 3.3 |
| Natura                  | goshawk  | 2.3  | 2.5    | 0.0  | 4.0   | 1.2  | 0.4 |
|                         | Ural owl | 1.8  | 1.5    | 0.0  | 4.0   | 1.4  | 0.4 |
|                         | control  | 0.7  | 0.0    | 0.0  | 4.0   | 1.3  | 0.4 |
| wintering & coniferous  |          |      |        |      |       |      |     |
| Richness                | goshawk  | 12.8 | 12.5   | 10.0 | 17.0  | 2.5  | 0.8 |
|                         | Ural owl | 13.1 | 13.0   | 9.0  | 17.0  | 2.9  | 0.9 |
|                         | control  | 12.2 | 12.5   | 9.0  | 15.0  | 2.0  | 0.6 |
| Abundance               | goshawk  | 39.6 | 33.5   | 24.0 | 72.0  | 16.4 | 5.2 |
|                         | Ural owl | 32.3 | 31.0   | 20.0 | 47.0  | 9.1  | 2.9 |
|                         | control  | 32.2 | 29.5   | 24.0 | 47.0  | 7.3  | 2.3 |
| Natura                  | goshawk  | 0.1  | 0.0    | 0.0  | 1.0   | 0.3  | 0.1 |
|                         | Ural owl | 0.3  | 0.0    | 0.0  | 1.0   | 0.5  | 0.2 |
|                         | control  | 0.5  | 0.0    | 0.0  | 2.0   | 0.7  | 0.2 |
| breeding & deciduous    |          |      |        |      |       |      |     |
| Richness                | goshawk  | 33.7 | 32.5   | 28.0 | 42.0  | 4.7  | 1.5 |
|                         | Ural owl | 33.3 | 32.5   | 29.0 | 37.0  | 3.2  | 1.0 |
|                         | control  | 25.2 | 25.5   | 19.0 | 30.0  | 3.3  | 1.1 |
| Abundance               | goshawk  | 75.2 | 68.5   | 60.0 | 102.0 | 13.0 | 4.1 |
|                         | Ural owl | 73.0 | 71.5   | 61.0 | 85.0  | 7.7  | 2.4 |
|                         | control  | 49.3 | 47.0   | 36.0 | 60.0  | 7.1  | 2.3 |
| Natura                  | goshawk  | 4.8  | 5.0    | 2.0  | 6.0   | 1.4  | 0.4 |
|                         | Ural owl | 4.8  | 5.0    | 3.0  | 6.0   | 1.2  | 0.4 |
|                         | control  | 0.9  | 0.5    | 0.0  | 3.0   | 1.1  | 0.3 |
| breeding & coniferous   |          |      |        |      |       |      |     |
| Richness                | goshawk  | 23.8 | 24.0   | 18.0 | 27.0  | 2.6  | 0.8 |
|                         | Ural owl | 25.3 | 24.5   | 20.0 | 32.0  | 3.4  | 1.1 |
|                         | control  | 22.9 | 22.5   | 18.0 | 31.0  | 3.9  | 1.2 |
| Abundance               | goshawk  | 53.6 | 53.5   | 44.0 | 62.0  | 5.4  | 1.7 |
|                         | Ural owl | 56.1 | 57.0   | 43.0 | 69.0  | 8.9  | 2.8 |
|                         | control  | 52.5 | 51.0   | 38.0 | 74.0  | 9.6  | 3.0 |
| Natura                  | goshawk  | 2.2  | 1.0    | 0.0  | 7.0   | 2.1  | 0.7 |
|                         | Ural owl | 2.2  | 1.5    | 0.0  | 7.0   | 2.0  | 0.6 |
|                         | control  | 1.1  | 1.0    | 0.0  | 3.0   | 0.9  | 0.3 |
| environmental variables |          |      |        |      |       |      |     |
| OldTrees                | goshawk  | 20.8 | 13.3   | 0.0  | 90.4  | 25.9 | 5.8 |
|                         | Ural owl | 14.9 | 6.3    | 0.0  | 83.7  | 21.0 | 4.7 |
|                         | control  | 6.9  | 4.5    | 0.0  | 19.7  | 6.7  | 1.5 |
| Stumps                  | goshawk  | 9.4  | 6.8    | 0.0  | 36.9  | 10.6 | 2.4 |
|                         | Ural owl | 6.1  | 2.7    | 0.0  | 30.5  | 7.9  | 1.8 |
|                         | control  | 23.6 | 5.5    | 0.0  | 130.6 | 33.0 | 7.4 |

|           |          |      |      |      |       |      |      |
|-----------|----------|------|------|------|-------|------|------|
| ClearCuts | goshawk  | 2.8  | 0.0  | 0.0  | 28.0  | 7.0  | 1.6  |
|           | Ural owl | 2.8  | 0.0  | 0.0  | 19.0  | 5.3  | 1.2  |
|           | control  | 7.5  | 6.0  | 0.0  | 20.0  | 7.5  | 1.7  |
| DeadWood  | goshawk  | 93.2 | 75.8 | 5.9  | 341.9 | 78.9 | 17.6 |
|           | Ural owl | 82.0 | 66.6 | 20.4 | 341.9 | 70.2 | 15.7 |
|           | control  | 36.5 | 30.6 | 5.2  | 74.2  | 19.1 | 4.3  |

---



Table S4. Values of basic environmental variables collected for selected plots.

| site ID  | Wood (type) | OldTrees | ClearCuts | DeadWood | Stumps |
|----------|-------------|----------|-----------|----------|--------|
| AG01     | 1           | 11.7     | 8         | 44.7     | 15.5   |
| AG02     | 1           | 23.7     | 0         | 122.6    | 10.8   |
| AG03     | 1           | 27.9     | 0         | 100.0    | 14.0   |
| AG04     | 1           | 16.3     | 0         | 103.1    | 10.2   |
| AG05     | 1           | 9.2      | 5         | 78.2     | 16.1   |
| AG06     | 1           | 90.4     | 0         | 257.4    | 0.0    |
| AG07     | 1           | 83.7     | 0         | 341.9    | 0.0    |
| AG08     | 1           | 13.1     | 0         | 41.1     | 7.5    |
| AG09     | 1           | 30.0     | 0         | 121.4    | 0.0    |
| AG10     | 1           | 50.5     | 0         | 115.8    | 0.0    |
| AG11     | 0           | 1.5      | 0         | 65.4     | 2.3    |
| AG12     | 0           | 1.6      | 0         | 36.8     | 19.6   |
| AG13     | 0           | 4.4      | 0         | 77.9     | 1.5    |
| AG14     | 0           | 5.8      | 0         | 89.4     | 14.5   |
| AG15     | 0           | 16.5     | 0         | 71.1     | 1.3    |
| AG16     | 0           | 15.3     | 28        | 46.7     | 36.9   |
| AG17     | 0           | 13.4     | 0         | 23.7     | 6.2    |
| AG18     | 0           | 0.0      | 0         | 47.5     | 1.5    |
| AG19     | 0           | 0.0      | 0         | 5.9      | 0.0    |
| AG20     | 0           | 1.5      | 14        | 73.7     | 30.5   |
| SU01     | 1           | 11.7     | 8         | 44.7     | 15.5   |
| SU02     | 1           | 36.6     | 0         | 157.0    | 0.0    |
| SU03     | 1           | 27.9     | 0         | 100.0    | 14.0   |
| SU04     | 1           | 19.4     | 0         | 107.5    | 6.5    |
| SU05     | 1           | 16.3     | 0         | 103.1    | 10.2   |
| SU06     | 1           | 9.2      | 5         | 78.2     | 16.1   |
| SU07     | 1           | 83.7     | 0         | 341.9    | 0.0    |
| SU08     | 1           | 13.1     | 0         | 41.1     | 7.5    |
| SU09     | 1           | 7.4      | 0         | 44.4     | 0.0    |
| SU10     | 1           | 30.0     | 0         | 121.4    | 0.0    |
| SU11     | 0           | 5.1      | 19        | 20.4     | 8.2    |
| SU12     | 0           | 3.0      | 0         | 59.5     | 3.0    |
| SU13     | 0           | 2.4      | 4         | 75.0     | 2.4    |
| SU14     | 0           | 2.6      | 0         | 47.0     | 0.0    |
| SU15     | 0           | 4.4      | 0         | 77.9     | 1.5    |
| SU16     | 0           | 0.0      | 0         | 34.7     | 0.0    |
| SU17     | 0           | 0.0      | 0         | 47.5     | 1.5    |
| SU18     | 0           | 0.0      | 6         | 37.4     | 0.7    |
| SU19     | 0           | 3.9      | 0         | 33.0     | 3.9    |
| SU20     | 0           | 1.5      | 14        | 73.7     | 30.5   |
| unocup01 | 1           | 10.4     | 20        | 5.2      | 51.9   |
| unocup02 | 1           | 10.3     | 14        | 21.8     | 43.6   |
| unocup03 | 1           | 19.7     | 17        | 28.9     | 44.7   |
| unocup04 | 1           | 11.5     | 0         | 51.9     | 0.0    |
| unocup05 | 1           | 5.6      | 0         | 9.0      | 20.2   |
| unocup06 | 1           | 19.2     | 12        | 23.1     | 57.7   |

|          |   |      |    |      |       |
|----------|---|------|----|------|-------|
| unocup07 | 1 | 7.5  | 18 | 22.6 | 23.6  |
| unocup08 | 1 | 6.3  | 8  | 35.8 | 0.0   |
| unocup09 | 1 | 15.0 | 0  | 73.5 | 4.7   |
| unocup10 | 1 | 17.6 | 0  | 48.9 | 31.3  |
| unocup11 | 0 | 0.7  | 0  | 22.7 | 0.7   |
| unocup12 | 0 | 0.9  | 0  | 28.8 | 0.0   |
| unocup13 | 0 | 1.8  | 16 | 74.2 | 1.8   |
| unocup14 | 0 | 3.1  | 4  | 30.0 | 6.3   |
| unocup15 | 0 | 3.3  | 0  | 34.3 | 0.0   |
| unocup16 | 0 | 0.7  | 3  | 60.4 | 0.7   |
| unocup17 | 0 | 2.5  | 0  | 29.5 | 0.8   |
| unocup18 | 0 | 1.5  | 9  | 31.3 | 0.0   |
| unocup19 | 0 | 0.0  | 13 | 41.6 | 130.6 |
| unocup20 | 0 | 0.9  | 15 | 56.7 | 54.0  |

---
